# Supplementary material for: Incorporation of Zinc Hydroxide Sulphate (ZHS) Nanoplates into Epoxy Resin to Improve Its Corrosion Protection
Source: MDPI journal article supplement (doi:10.3390/min13020180), 2023-01-26
Supplement: s1 [file s1]

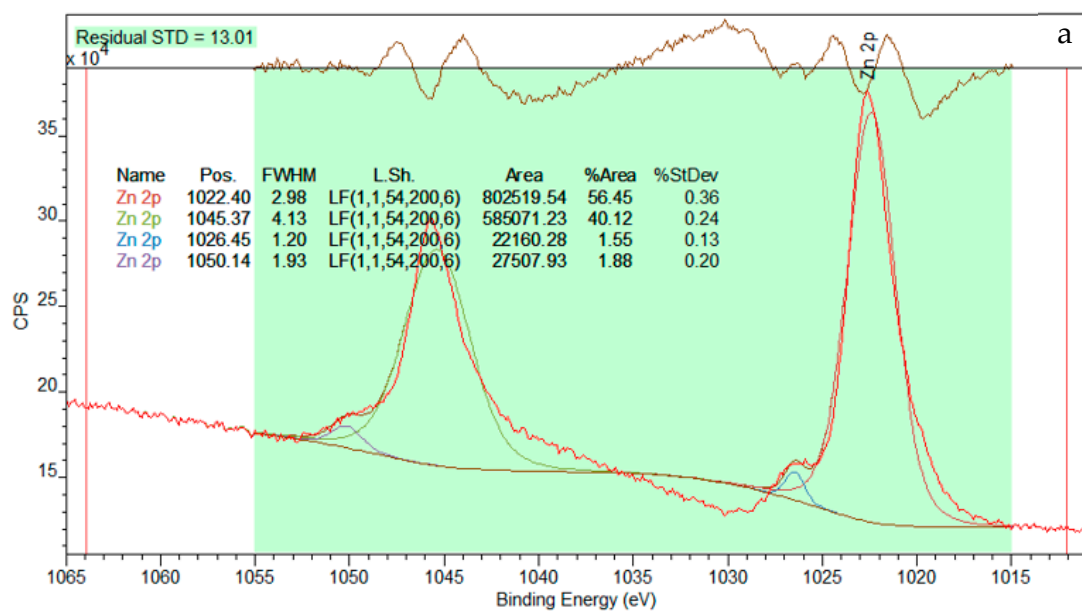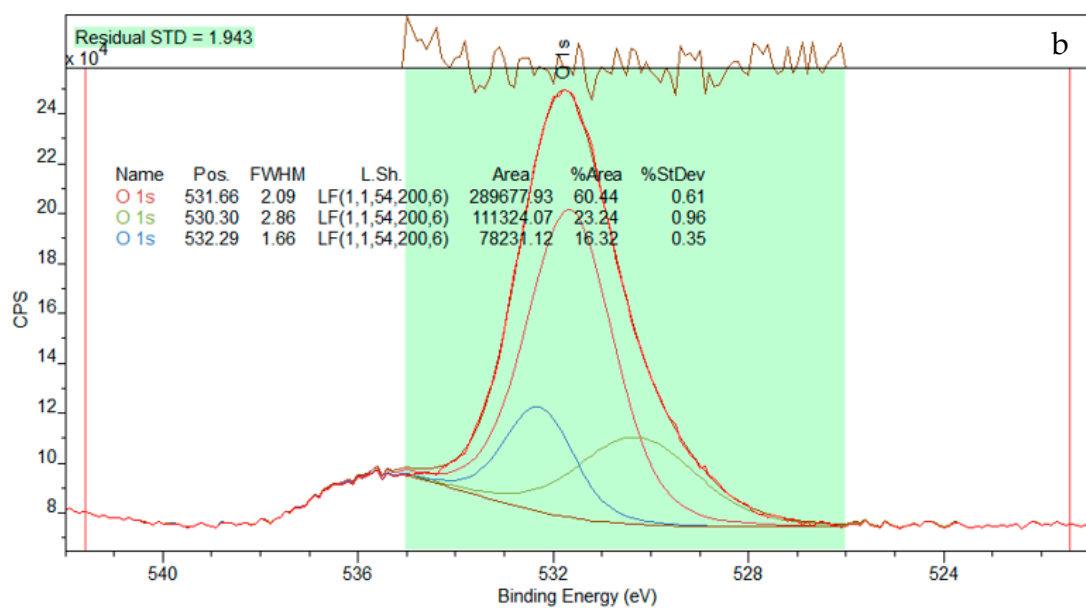

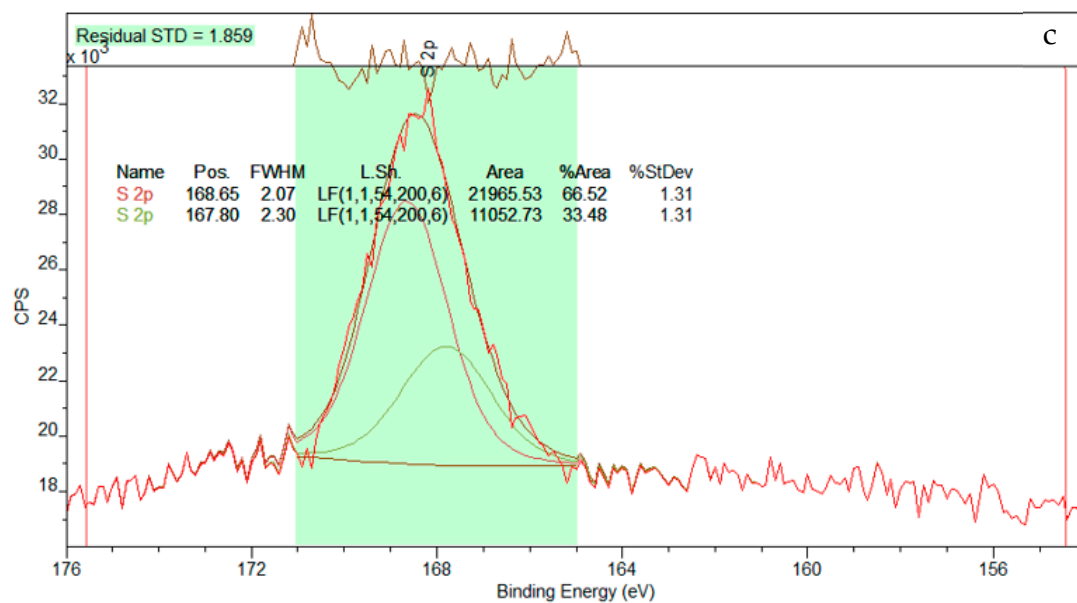

Figure S1. Analysis of the high-resolution XPS peaks: Zn 2p (a), O 1s (b), and Si 2p (c)

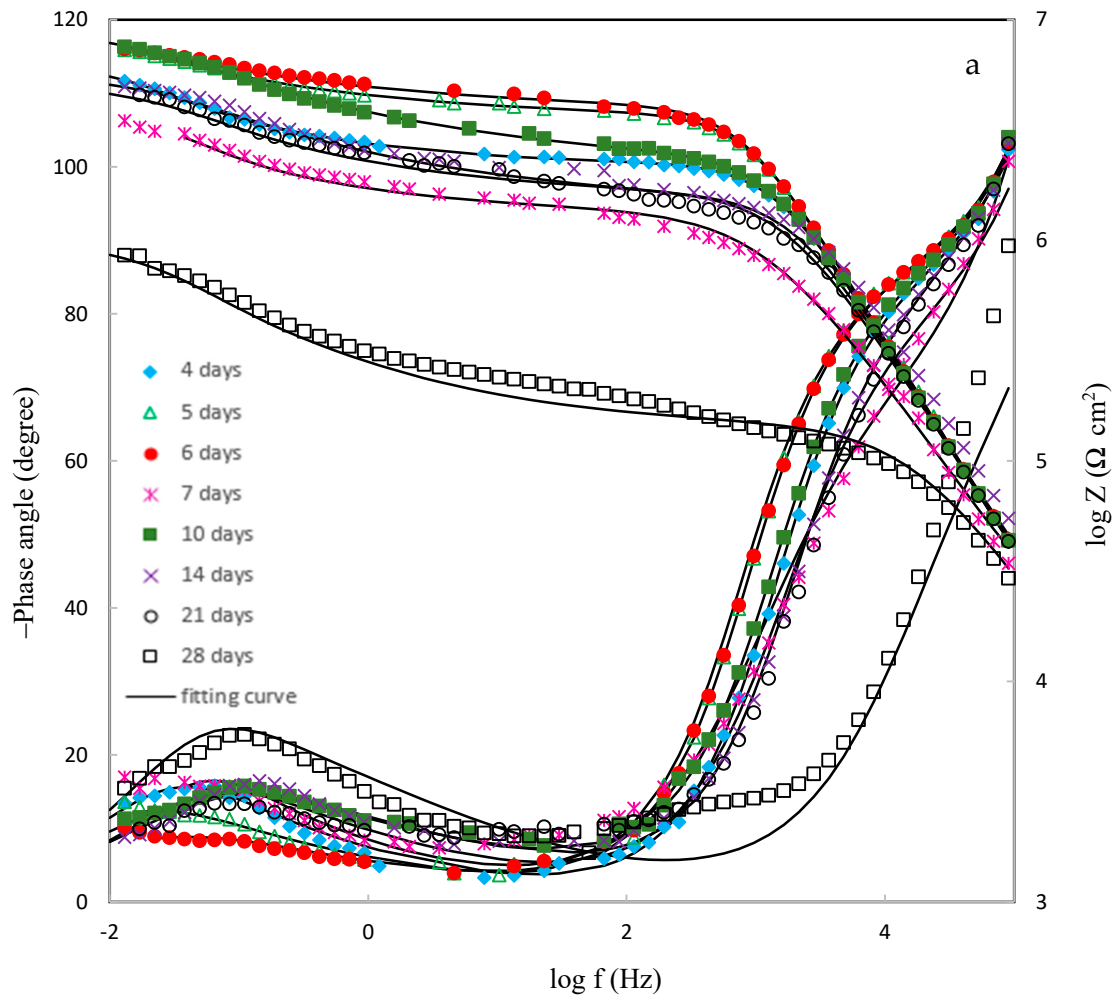

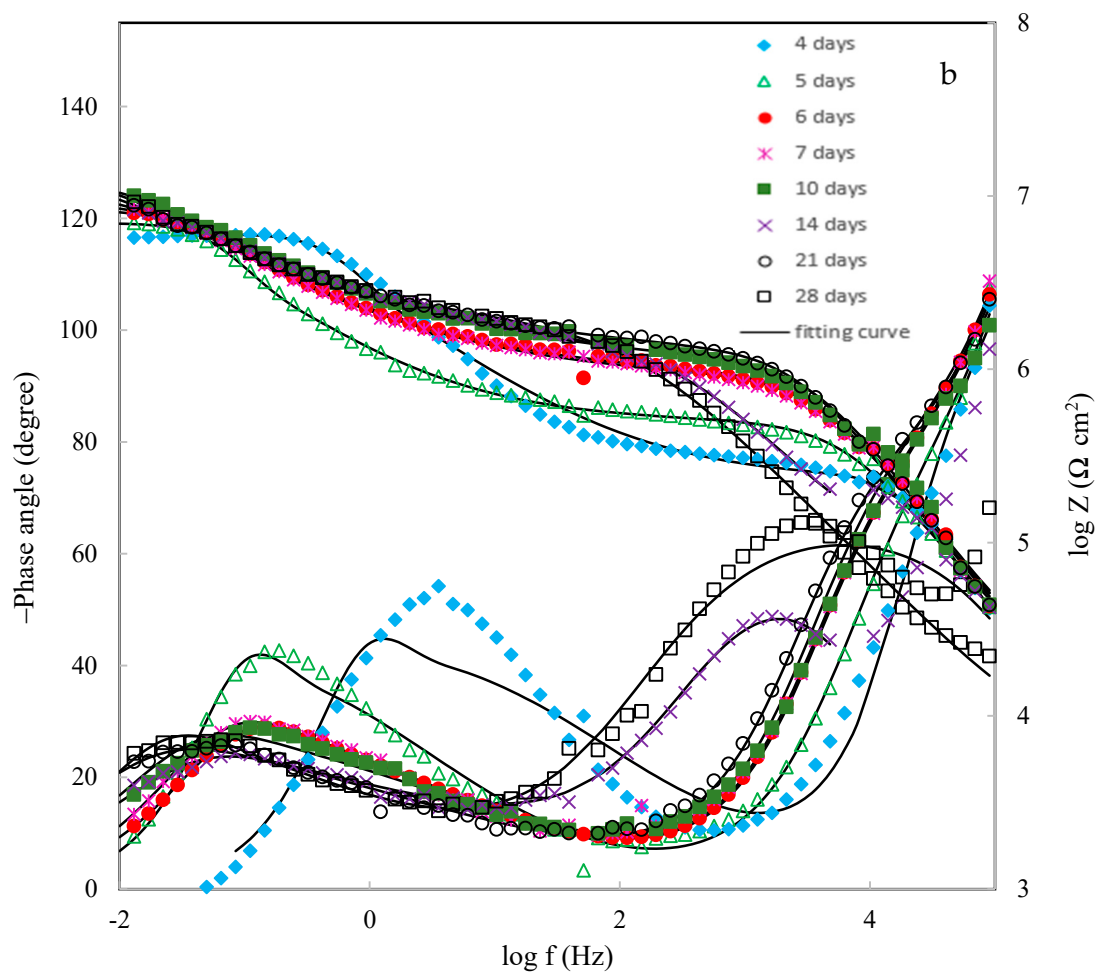

Figure S2. The Bode plots of the neat (a) and ZHS-containing (b) epoxy coatings after immersion in 3.5 wt. % NaCl solution
